# Supplementary material for: Radiation resistance due to high expression of miR-21 and G2/M checkpoint arrest in breast cancer cells
Source: PubMed Central journal article supplement (PMC3573984; doi:10.1186/1748-717x-7-206), 2012-12-05

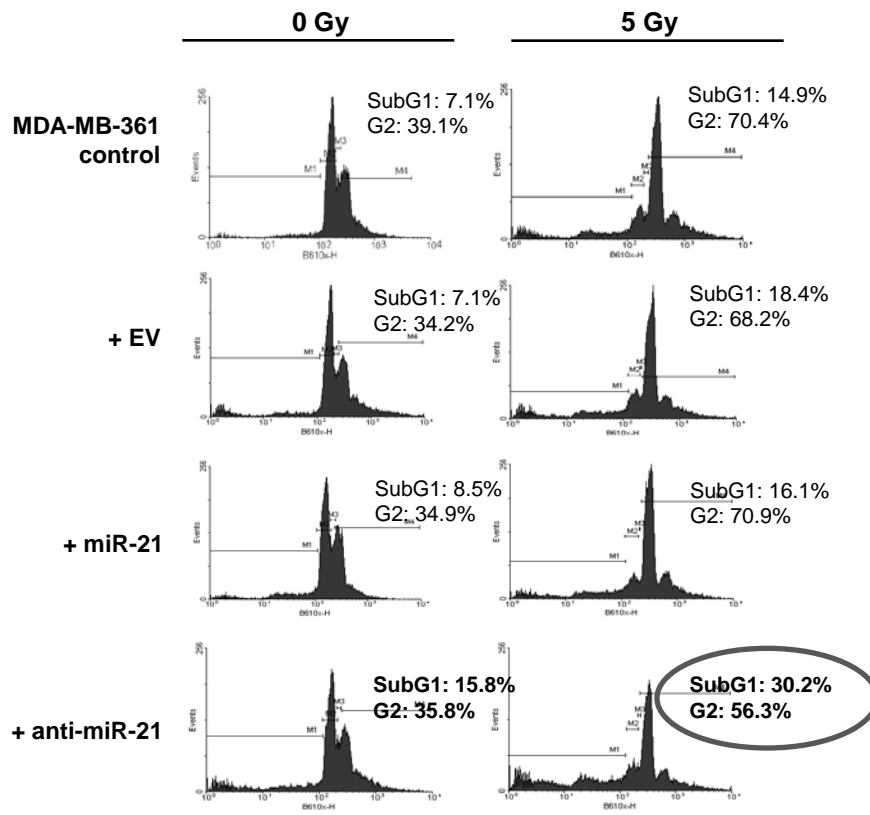

Supplement: 1748-717X-7-206-S2.pdf [file 1748-717X-7-206-S2.pdf]
